# Supplementary material
Source: PubMed Central journal article supplement (PMC11129837)
Supplement: NIHMS1994003-supplement-supplement.pdf [file NIHMS1994003-supplement-supplement.pdf]

## Supporting Information for Publication

# Non-Viral In Vivo Delivery of CRISPR-Cas9 using Protein-Agnostic, High-Loading Porous Silicon and Polymer Nanoparticles

R. Brock Fletcher<sup>1</sup>, Larry Stokes<sup>1</sup>, Isom B Kelly III<sup>1</sup>, Katelyn Henderson<sup>1</sup>, Isabel Vallecillo-Viejo<sup>1</sup>, Juan M. Colazo<sup>1</sup>, Benjamin Wong<sup>1</sup>, Fang Yu<sup>1</sup>, Richard d'Arcy<sup>1</sup>, Morgan Struthers<sup>1</sup>, Brian C Evans<sup>1</sup>, Jacob Ayers<sup>1</sup>, Matthew Castanon<sup>1</sup>, Michael J Weirich<sup>1</sup>, Sarah Reilly<sup>1</sup>, Shruti Patel<sup>1</sup>, Yoanna Ivanova<sup>1</sup>, Carlos A. Silvera Batista<sup>2</sup>, Sharon M. Weiss<sup>3</sup>, Charles A. Gersbach<sup>4</sup>, Jonathan Brunger<sup>1</sup>, Craig L. Duvall<sup>\*,1</sup>

<sup>1</sup> Dept. of Biomedical Engineering, Vanderbilt University, Nashville, TN, US 37235-1631

<sup>2</sup> Dept. of Chemical and Biomolecular Engineering, Vanderbilt University, Nashville, TN, US 37235-1631

<sup>3</sup> Dept. of Electrical Engineering, Vanderbilt University, Nashville, TN, US 37235-1631

<sup>4</sup> Dept. of Biomedical Engineering, Duke University, Durham, NC, US 27708

\* Corresponding Author: [craig.duvall@vanderbilt.edu](mailto:craig.duvall@vanderbilt.edu)

## Contents

|                                                                                      |    |
|--------------------------------------------------------------------------------------|----|
| Supplementary Data.....                                                              | 3  |
| Figure S1 NanoSight Report Data .....                                                | 3  |
| Figure S2 Quantification of Particle Porosity .....                                  | 4  |
| Figure S3 Modeling of PSiNP pore Electrostatics.....                                 | 5  |
| Figure S4 PSiNP Loading calculations and TGA measurements.....                       | 6  |
| Figure S5 Kinetics of BSA release from PSiNPs in PBS. ....                           | 7  |
| Figure S6 Confirmation of optimal PEGDB coating of PSiNPs.....                       | 8  |
| Figure S7 Cas9 PSiNP dose response linear regression .....                           | 9  |
| Figure S8 IDAA indel quantification method .....                                     | 10 |
| Figure S9 Editing in Ai9 mice following intramuscular administration of PSiNPs. .... | 11 |
| Figure S10 Biodistribution measurements of PSiNPs. ....                              | 12 |

## Supplementary Data

Table S1- sgRNA Target Sequences

| sgRNA Name      | Purpose                       | Target Sequence (5' to 3') |
|-----------------|-------------------------------|----------------------------|
| sgAi9-L         | Ai9 turn-on                   | AAAGAAUUGAUUUGAUACCG       |
| sgAi9-R         | Ai9 turn-on                   | GUAUGCUAUACGAAGUUAUU       |
| Rosa26-L        | Ai9 & mTmG cell line creation | GACUGGAGUUGCAGAUCACG       |
| Rosa26-R        | Ai9 & mTmG cell line creation | GAAGAUGGGCGGGAGUCUUC       |
| MMP13-sg7272835 | MMP13 knockout                | UCGGAGCCUGUCAACUGUGG       |
| sg-mTmG         | mTmG turn-on                  | AUUUAUACGAAGUUAUAUUAA      |

Table S2- Primer Sequences for IDAA and qPCR

| Primer Name        | Purpose | Sequence (5' to 3')                         |
|--------------------|---------|---------------------------------------------|
| MMP13.FWD          | qPCR    | GGCCAGAACTTCCCAACCAT                        |
| MMP13.REV          | qPCR    | GAGCCCAGAATTTTCTCCCTCT                      |
| ActB.FWD           | qPCR    | GACTCATCGTACTCCTGCTTG                       |
| ActB.REV           | qPCR    | GATTACTGCTCTGGCTCCTAG                       |
| Rpl13a.FWD         | qPCR    | ATGTCCCCTCTACCCACAG                         |
| Rpl13a.REV         | qPCR    | TGAACCCAATAAAGACTGTTTGC                     |
| IDAA_Universal_FAM | IDAA    | AGCTGACCGGCAGCAAATTG                        |
| Ai9_1.FWD          | IDAA    | ttcggcttctggcgtgtg                          |
| IDAA_Ai9_2.FWD     | IDAA    | AGCTGACCGGCAGCAAATTGcctctgctaaccatgttcatgcc |
| IDAA_Ai9_3.FWD     | IDAA    | AGCTGACCGGCAGCAAATTGctgggcaacgtgctggtattg   |
| IDAA_Ai9_4.REV     | IDAA    | AGCTGACCGGCAGCAAATTGgtgtgaccggcggctctag     |
| Ai9_5.REV          | IDAA    | cctcctcgcccttgctc                           |

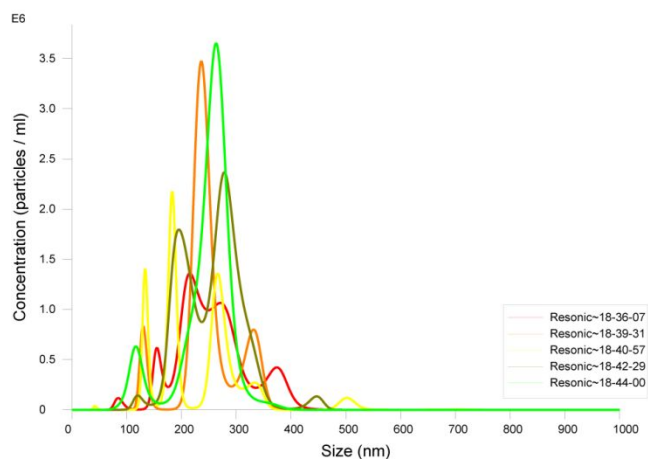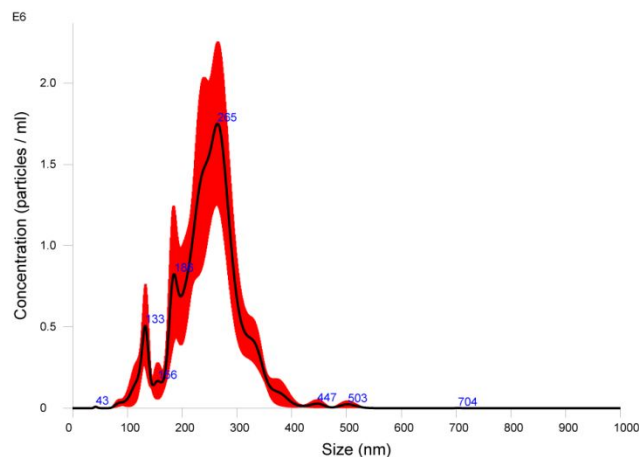

Averaged FTLA Concentration / Size for Experiment:  
Error bars indicate + / - 1 standard error of the mean

FTLA Concentration / Size graph for Experiment:

#### Capture Settings

Camera Type: sCMOS  
Laser Type: Red  
Camera Level: 2  
Slider Shutter: 7  
Slider Gain: 15  
FPS: 25.0  
Number of Frames: 1498  
Temperature: 20.4 - 20.6 °C  
Viscosity: (Water) 0.985 - 0.991 cP  
Dilution factor: Dilution not recorded

#### Analysis Settings

Detect Threshold: 11  
Blur Size: Auto  
Max Jump Distance: Auto: 9.5 - 11.8 pix

#### Results

Stats: Merged Data

Mean: 248.9 nm  
Mode: 264.6 nm  
SD: 59.8 nm  
D10: 177.9 nm  
D50: 251.4 nm  
D90: 318.2 nm

Stats: Mean +/- Standard Error

Mean: 247.7 +/- 3.9 nm  
Mode: 235.3 +/- 17.0 nm  
SD: 60.7 +/- 6.0 nm  
D10: 178.7 +/- 12.1 nm  
D50: 250.6 +/- 4.0 nm  
D90: 323.2 +/- 10.9 nm  
Concentration (Upgrade): 1.92e+08 +/- 2.32e+07 particles/ml  
18.8 +/- 2.3 particles/frame  
25.2 +/- 2.9 centres/frame

Concentration measurements may require some caution due to noise  
See summary file for more info

## Figure S1 NanoSight Report Data

Raw NanoSight report data. Five independent measurements (graph on left) were performed and combined to make the graphic included in the main figure (graph on right). Additionally, statistics from the merged data (right graph) are boxed in green.

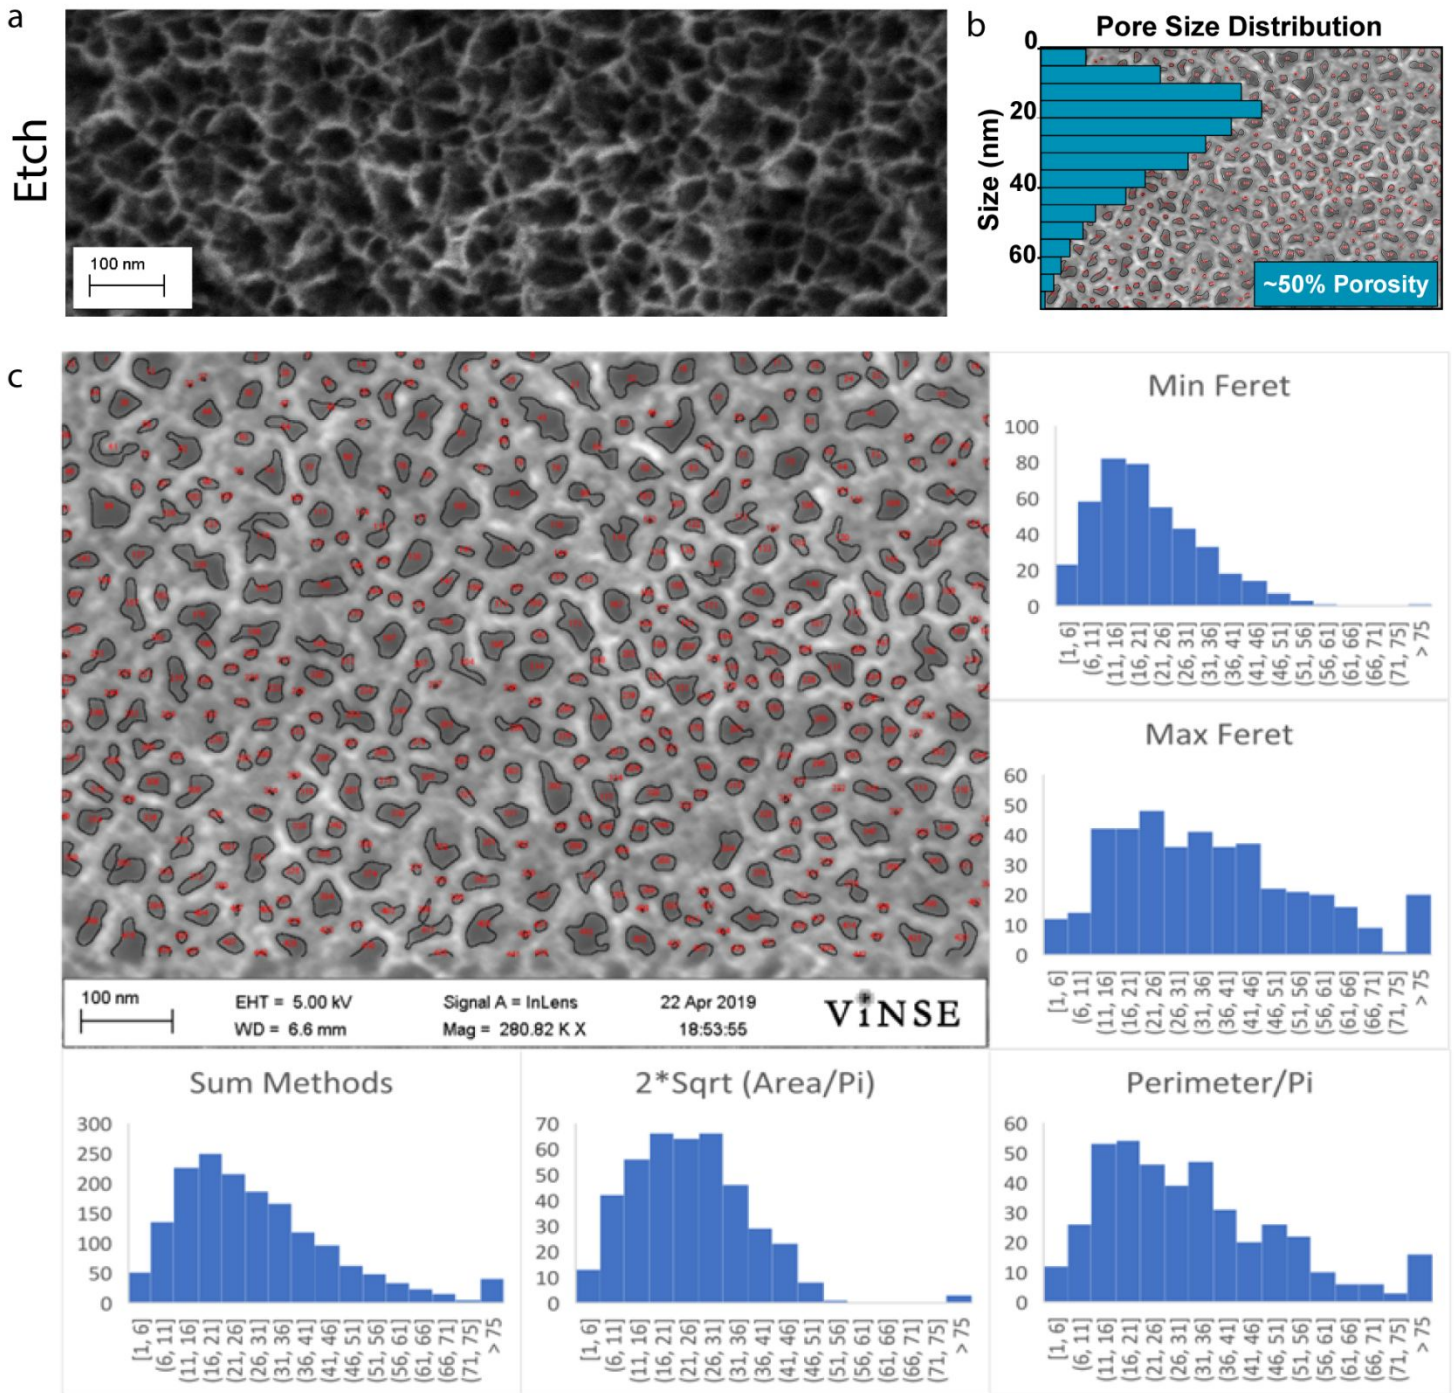

**Figure S2 Quantification of Particle Porosity**

Center Image: Original inlay SEM image with overlay of ImageJ pore segmentation. Surrounding graphs are histograms of various pore size distribution quantification methodologies. Summing the different methods yields the “sum methods” plot, from which the main-manuscript figure was made.

S3

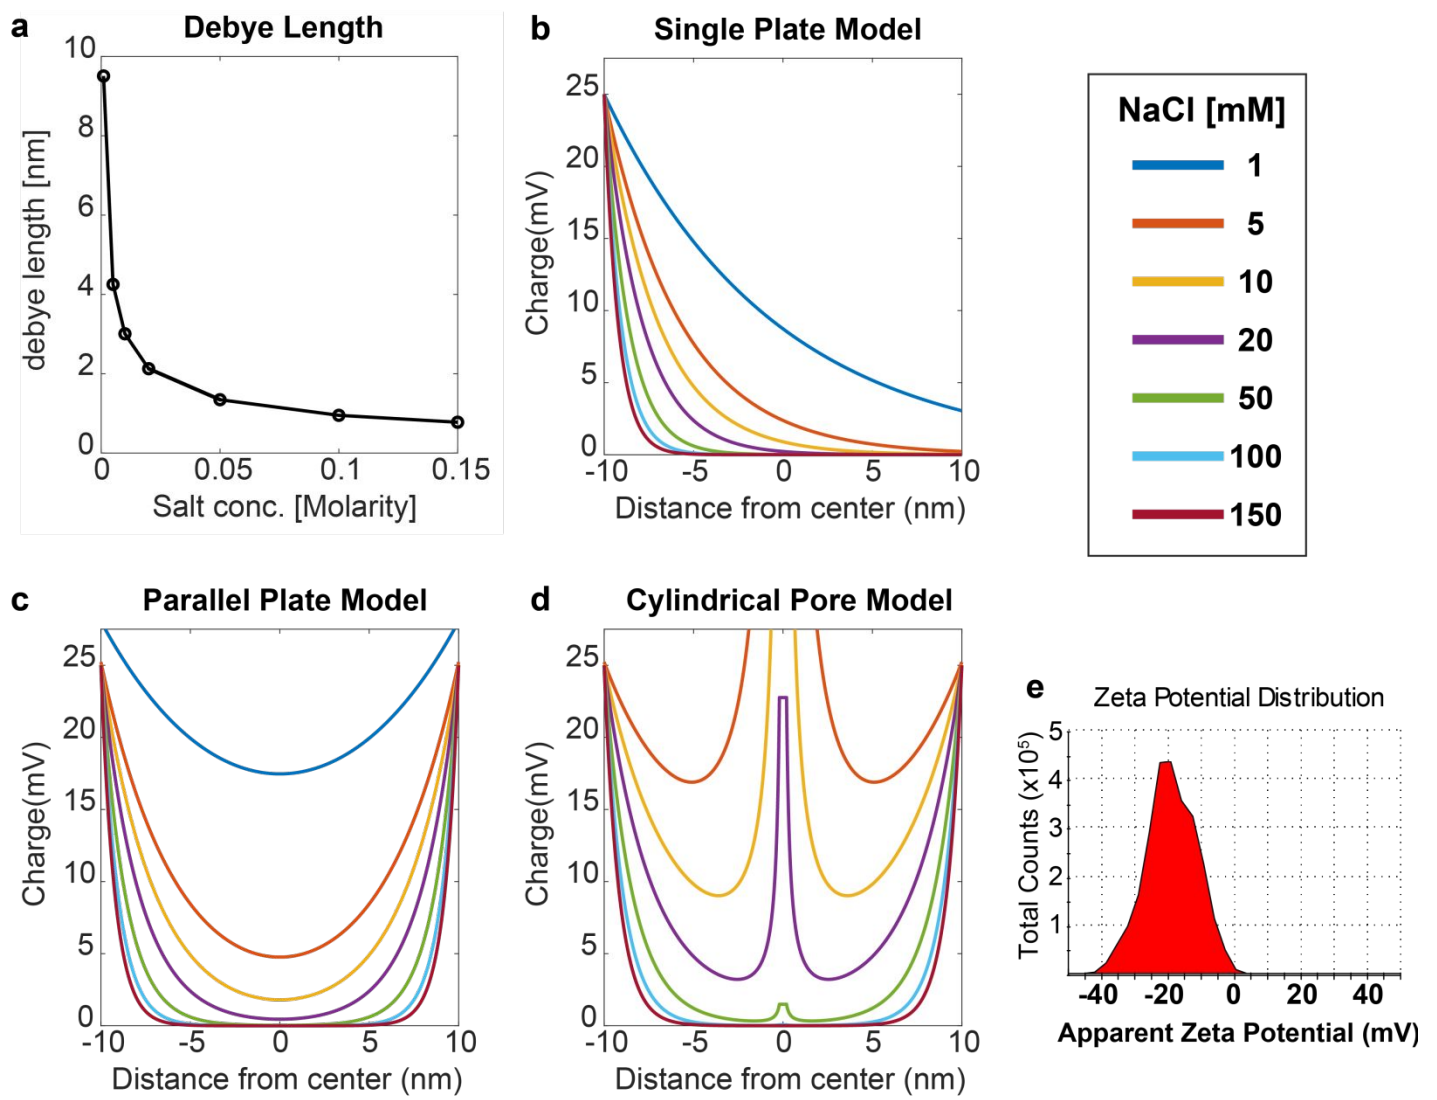

**Figure S3 Modeling of PSiNP pore Electrostatics.**

a) Debye Length as a function of NaCl concentration. (b) Electric field away from a single charged surface as a function of distance (x-axis) and NaCl concentration (line color). (c) Same as b but with two parallel plates 20 nm apart and using the linear superposition approximation. (d) Same as c but modeling within a cylinder instead. See [github.com/BrockFletcher/Cas9\\_Silicon](https://github.com/BrockFletcher/Cas9_Silicon). (e) Zeta potential distribution measured of porous silicon nanoparticles graphed in **Error! Reference source not found**.

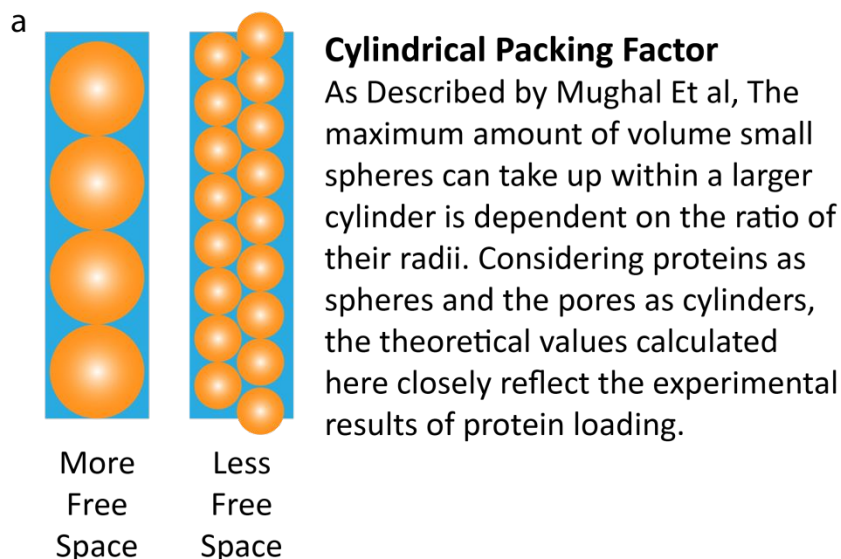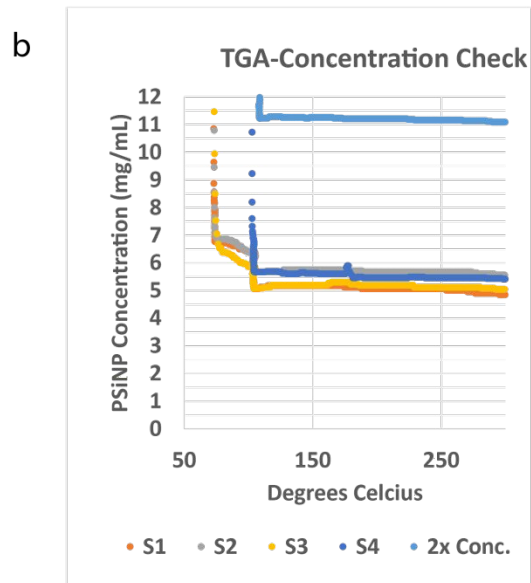

**c**

| Constants                 |                                                                   | Vol% Si  | Vol% Poly | Wt%   |
|---------------------------|-------------------------------------------------------------------|----------|-----------|-------|
| Protein Density           | 1.35                                                              | 50       | 27        | 20    |
| Silicon Density           | 2.49                                                              | 37       | 20        | 15    |
| Density Ratio:            | 1.84444                                                           | 25       | 14        | 10    |
| %Porosity                 | 0.5                                                               | 12       | 7         | 5     |
| Pore Size (nm)            | 20                                                                | 0        | 0         | 0     |
|                           |                                                                   |          |           |       |
|                           |                                                                   |          |           |       |
|                           | BSA                                                               | Cas9 RNP | CRE       | Cas9  |
| Sphere Radius (nm)        | 3.3                                                               | 10       | 3         | 9     |
| Ratio                     | 6.06                                                              | 2.00     | 6.67      | 2.22  |
| Packing Factor            | 0.6                                                               | 0.475    | 0.6       | 0.525 |
| Max Loading by Mass       | = %Porosity * Packing Factor * (Protein Density/ Silicon Density) |          |           |       |
| (Theory) Max Load by Mass | 16.3%                                                             | 12.9%    | 16.3%     | 14.2% |
| (Experi) Max Load by Mass | 16.9                                                              | 16.1     | 18.3      | 16.7  |

| S1     | S2   | S3   | S4   | 2xS  |
|--------|------|------|------|------|
| 5.18   | 5.73 | 5.20 | 5.47 | 5.56 |
|        |      |      |      |      |
| Mean   | 5.43 | 5.43 |      |      |
| StDev  | 0.21 | 0.11 | SEM  |      |
| Mean   |      |      | Mean |      |
| /StDev | 3.9% | 2.0% | /SEM |      |

**Figure S4 PSiNP Loading calculations and TGA measurements.**

a) Explanation of calculations and Packing factor. b) Thermogravimetric analysis used to accurately determine PSiNP Concentration. c) Estimations of maximal cargo loading into porous silicon nanoparticles.

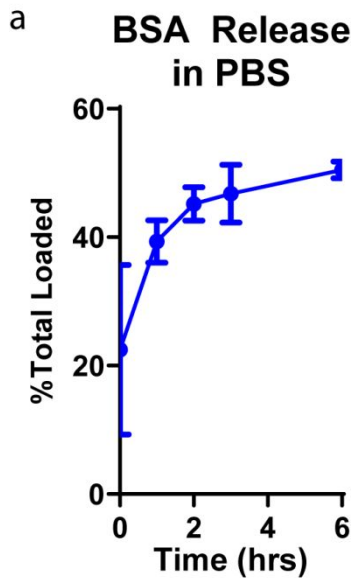

**Figure S5 Kinetics of BSA release from PSiNPs in PBS.**

a) Bovine Serum Albumin release kinetics from PSiNPs in infinite sink of PBS over 6 hours.



**a Polymer Coating Experiment Validation**

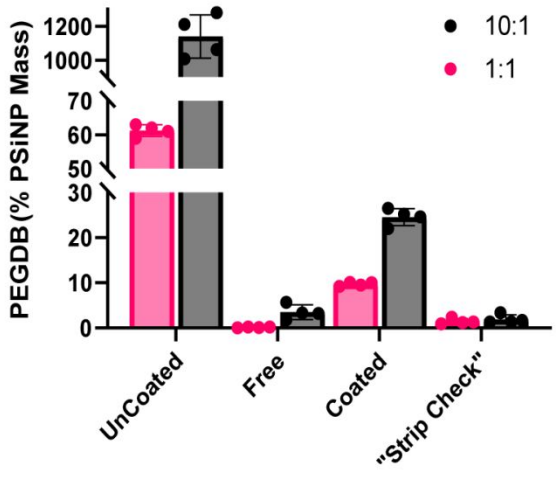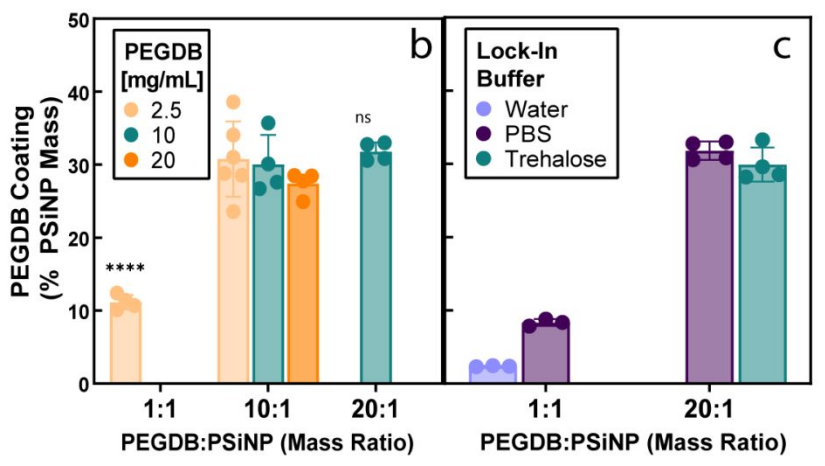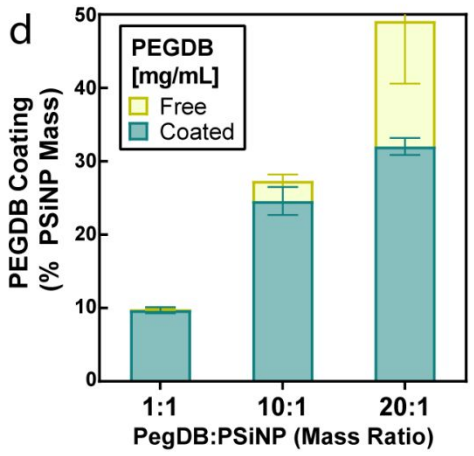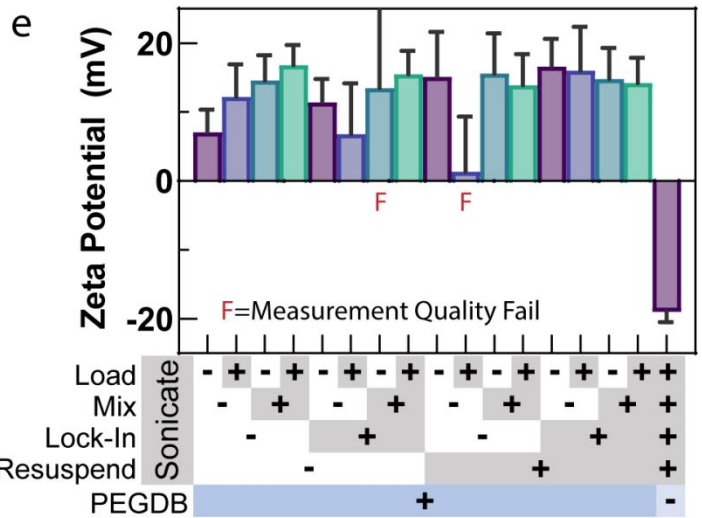

**Figure S6 Confirmation of optimal PEGDB coating of PSiNPs**

a) Quantification of labeled PEGDB at each step of the polymer coating assay. The protocol is detailed in the methods section, but, briefly, “Uncoated” refers to the PEGDB which does not coat the PSiNPs and thus does not pellet. “Free” refers to PEGDB which comes off in an added centrifugal wash step. “Coated” refers to PEGDB which was stably coating the porous silicon nanoparticles. “Strip Check” is a validation of the methods, as we use a stripping buffer to remove the PEGDB from the PSiNPs to measure concentration, and this is an additional step to ensure all PEGDB polymer has been removed from the PSiNPs. b) Effects of PEGDB concentration and PEGDB:PSiNP ratio on coating. c) Water vs. PBS and trehalose vs. PBS effects on PEGDB coating. Trehalose was not tested in the 1:1 group because we had not yet hypothesized its potential benefit. Water was not tested in the 20:1 group because it had already been proven inferior in the prior 1:1 testing. d) Amount of uncoated PEGDB as a function of incubation ratio. e) Zeta potential measurements corresponding to sonication-DLS measurements in Figure 3.

### Cas9 P*Si*NP Intramuscular Dose Response

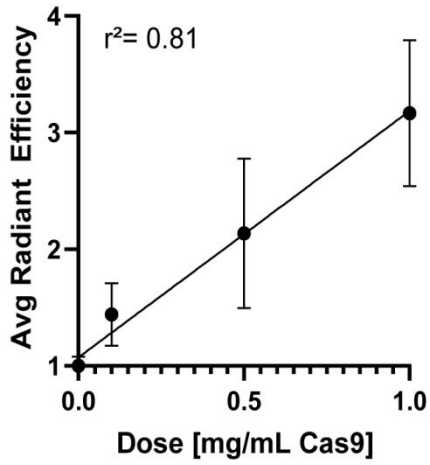

#### **Figure S7 Cas9 P*Si*NP dose response linear regression**

Dose response of IVIS signal from injected tibialis anterior muscle of Ai9 mice, plotted as the injected concentration (in mg/mL of Cas9 protein, 20  $\mu$ L injection) vs average radiant efficiency normalized to negative control (Buffer only).

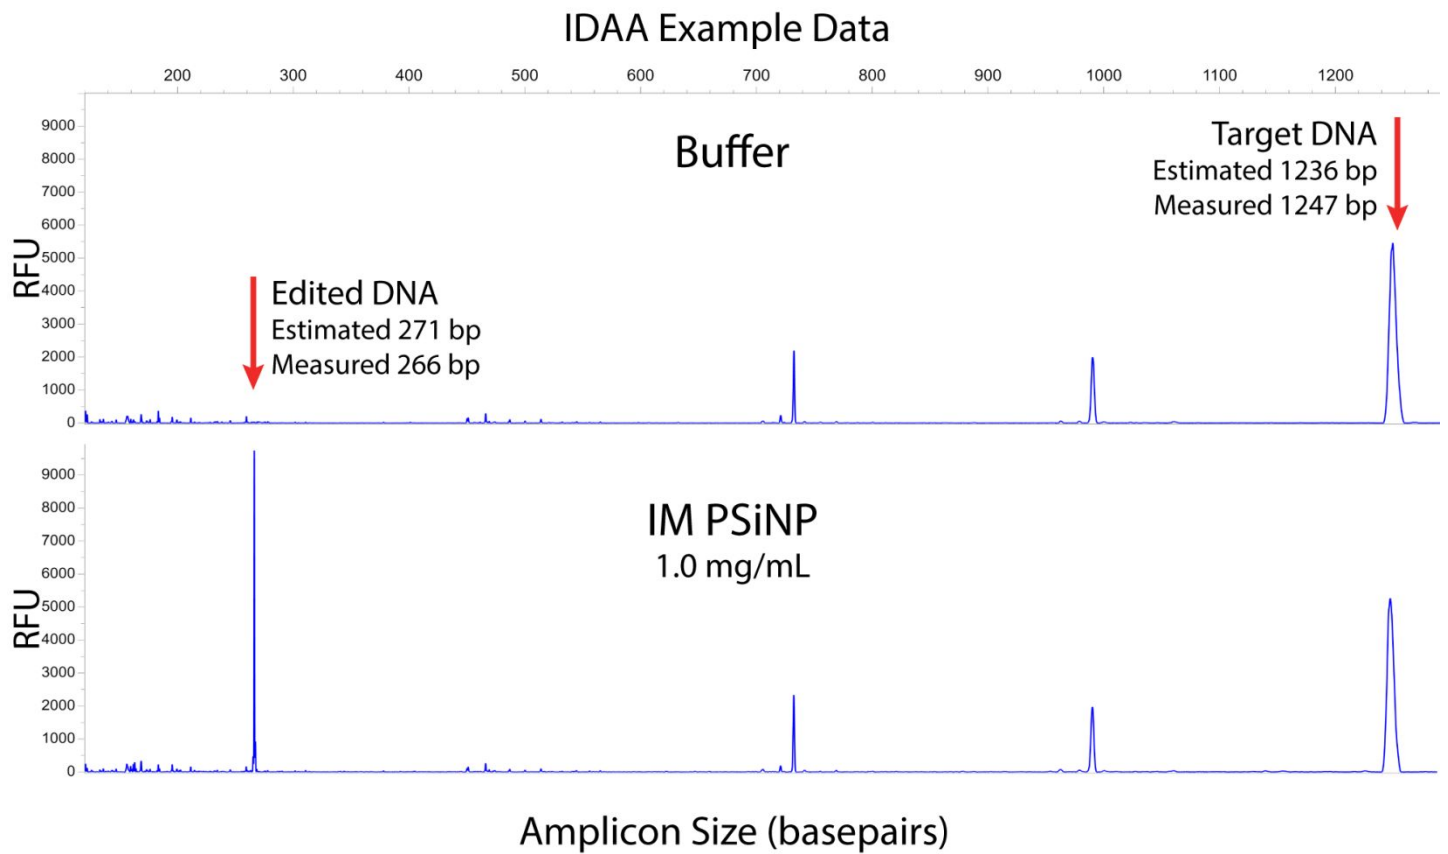

**Figure S8 IDAA indel quantification method**

a) Example fragment analysis traces used to quantify deletion the deletion strategy used in indel detection by amplicon analysis. Note the increase in signal at ~271 bp, the expected size of the Ai9 amplicon after deletion of nearly 1000 bp.

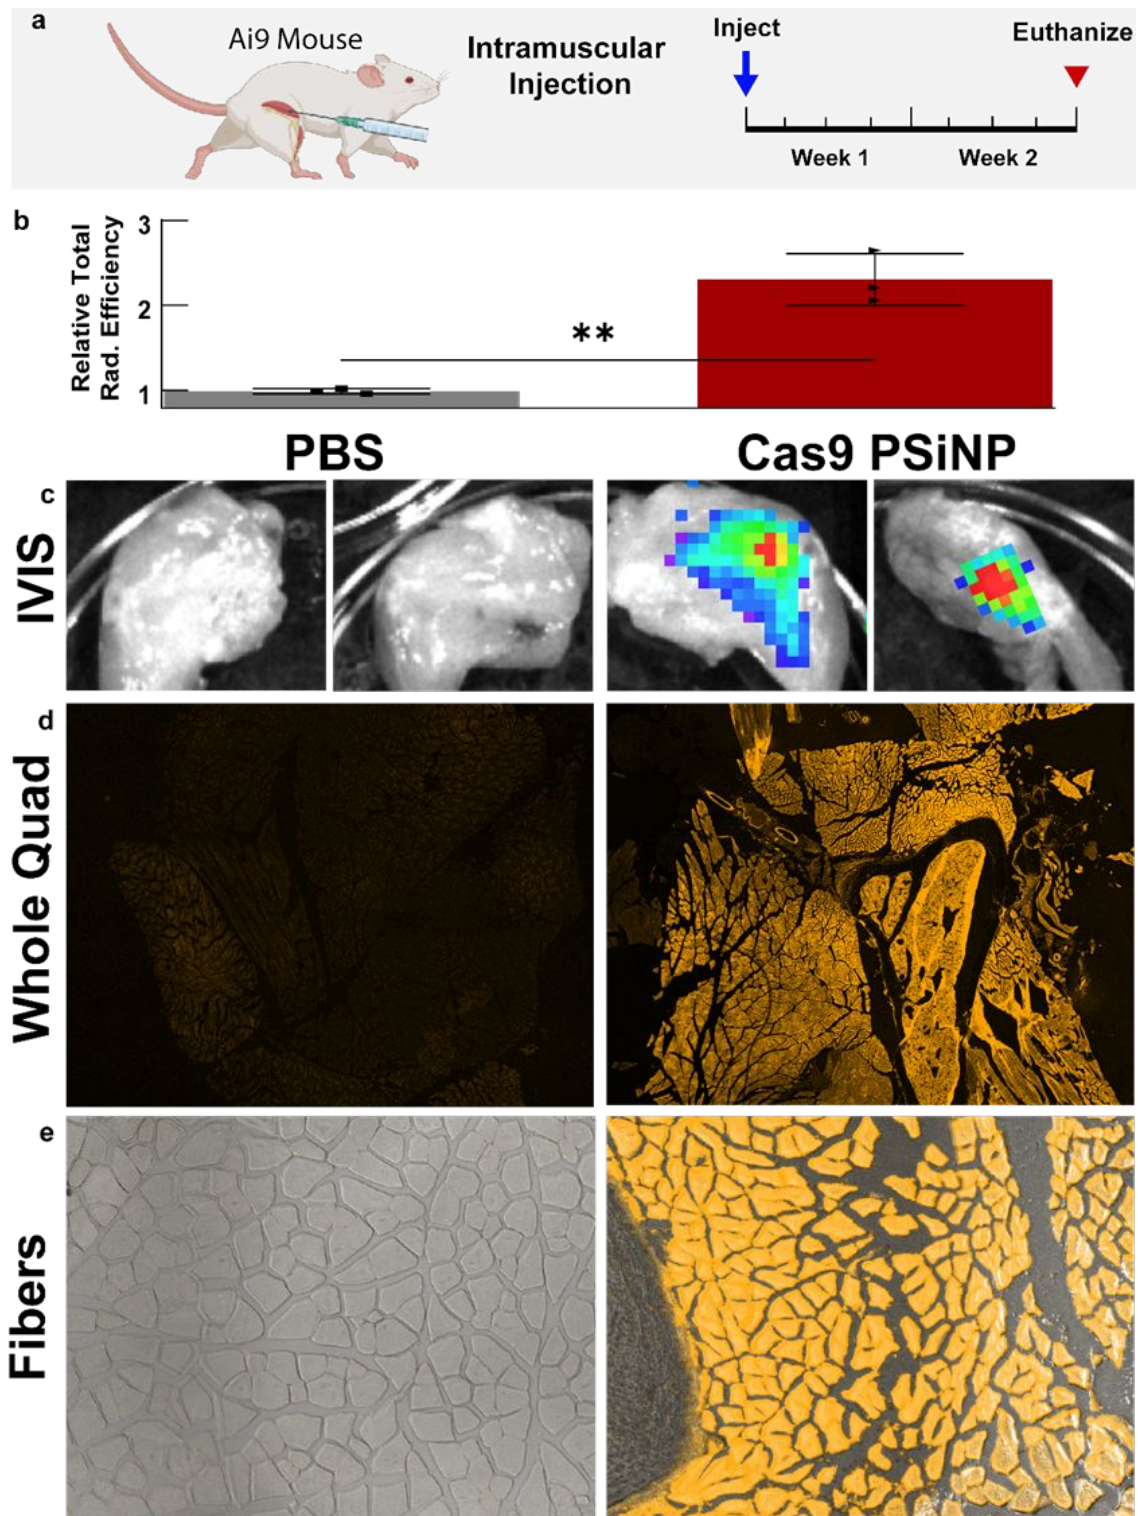

**Figure S9 Editing in Ai9 mice following intramuscular administration of PSiNPs.**

(a) Experimental timeline for direct quadriceps injection study. Muscle was injected with PSiNPs or PBS and harvested two weeks after the second injection. (b) IVIS (total radiant efficiency) data from mouse muscle after sacrifice. (c) Representative IVIS images of legs from each group. (d) Cryohistology to visualize tdTomato fluorescence in edited muscle fibers. (e) High magnification of muscle group to visualize edited fibers.

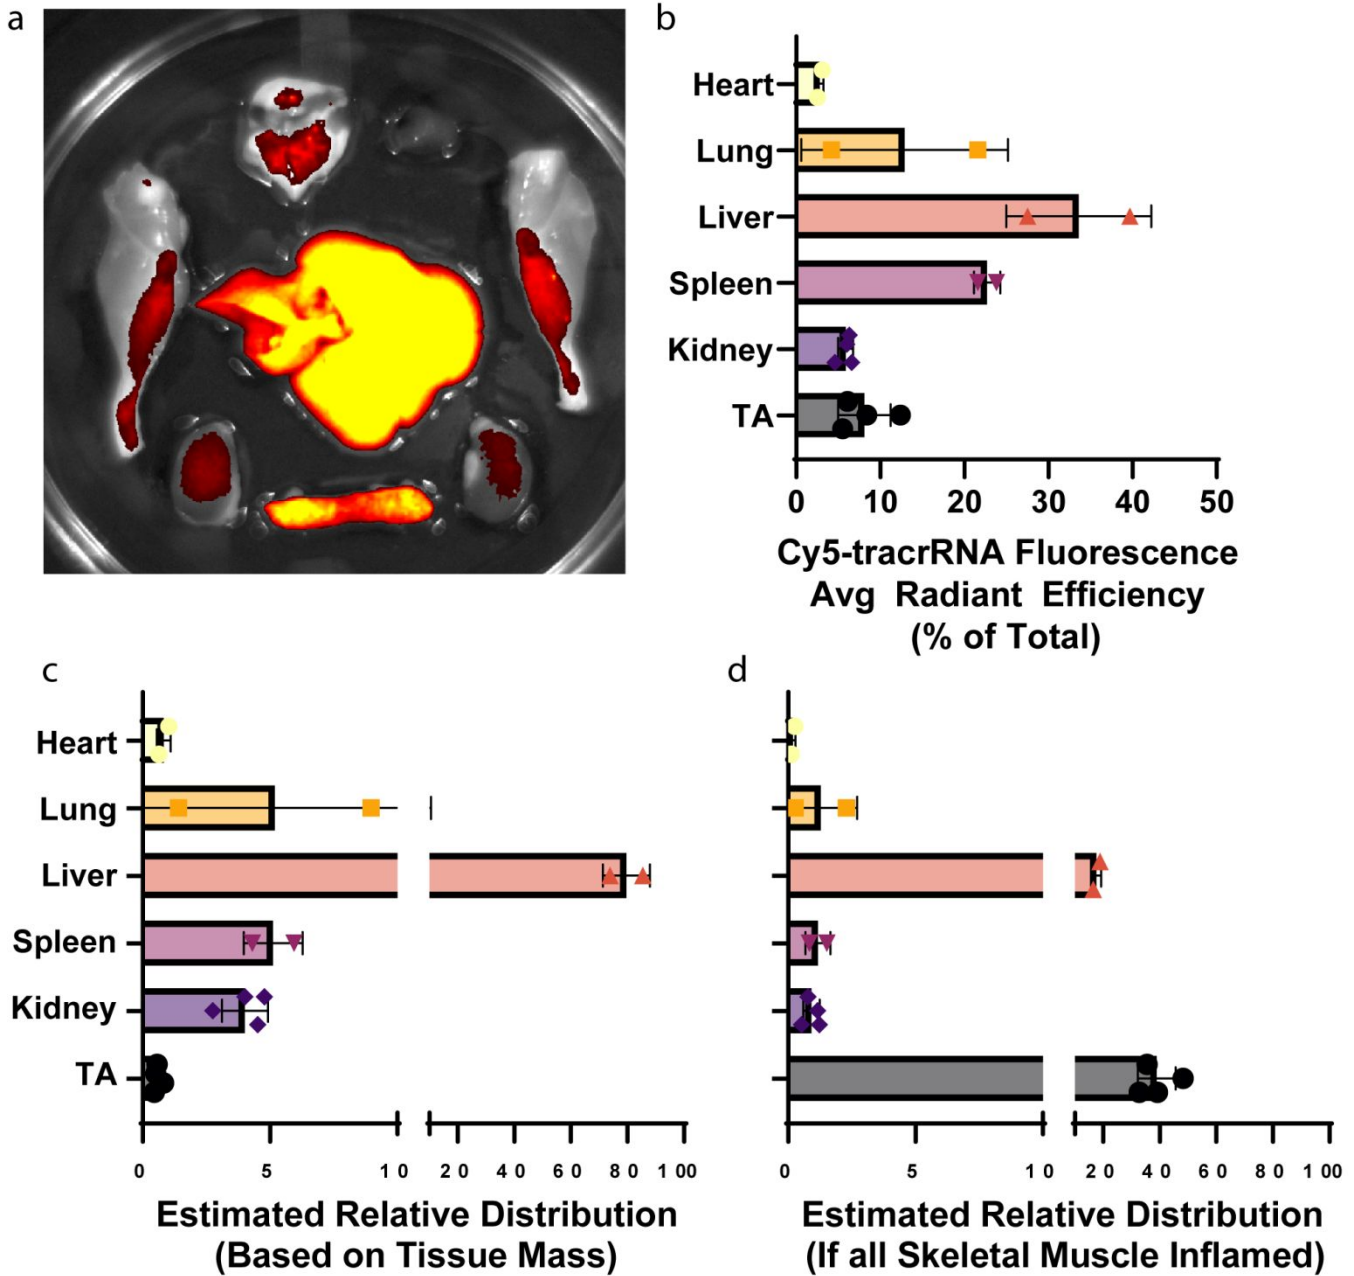

**Figure S10 Biodistribution measurements of PSINPs.**

(a) Example image displaying biodistribution of Cy5-labeled Cas9 RNP using IVIS Imaging (b) Quantification of IVIS imaging. The average radiant efficiency of each organ was summed up, and data is presented as a percentage of the total by organ. (c) Multiplying average radiant efficiency over background of the tissue by the measured mass of the tissue yields an estimated biodistribution in each organ (percent injected dose). (d) Repeating the estimation used in section c but multiplying by the total muscle mass yields the relative biodistribution if all skeletal muscle was inflamed like the tibialis anterior.
